# Supplementary material
Source: PubMed Central journal article supplement (PMC5562950)

**A**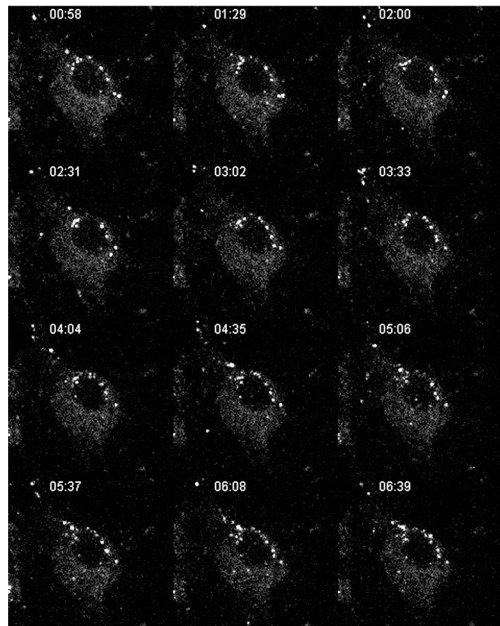**B**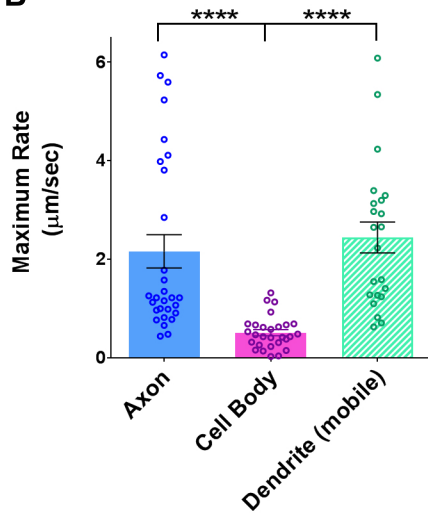**C**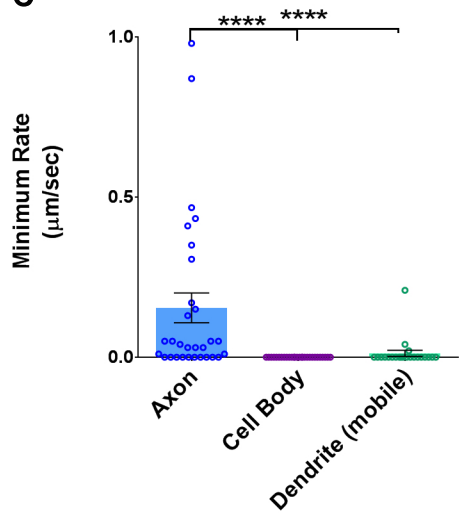

Supplement: NIHMS893019-supplement-Figure_S1.pdf [file NIHMS893019-supplement-Figure_S1.pdf]

*In vitro* P-TrkA antibody specificity

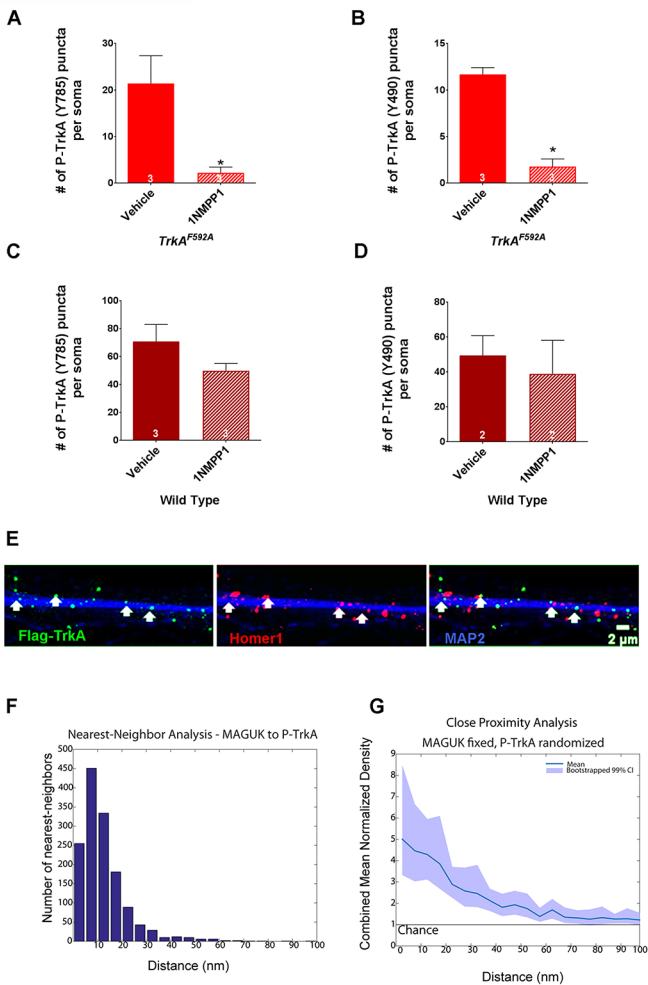

Supplement: NIHMS893019-supplement-Figure_S2.pdf [file NIHMS893019-supplement-Figure_S2.pdf]

## In vivo P-TrkA antibody specificity

**A**

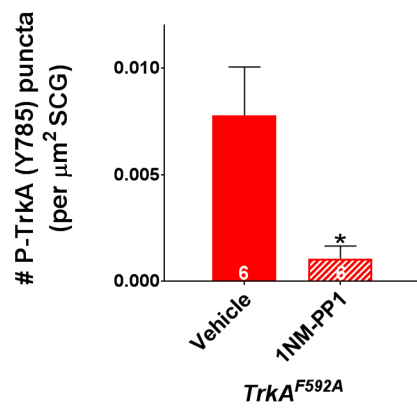

**B**

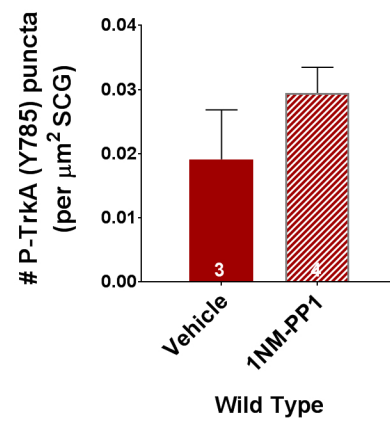

**C**

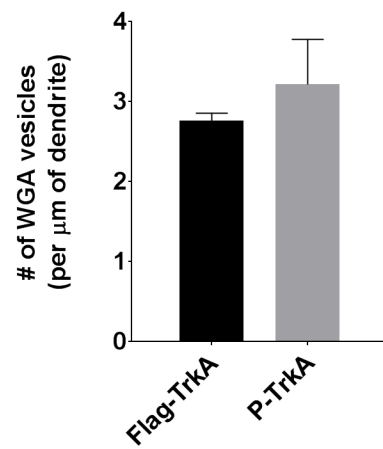

Supplement: NIHMS893019-supplement-Figure_S3.pdf [file NIHMS893019-supplement-Figure_S3.pdf]

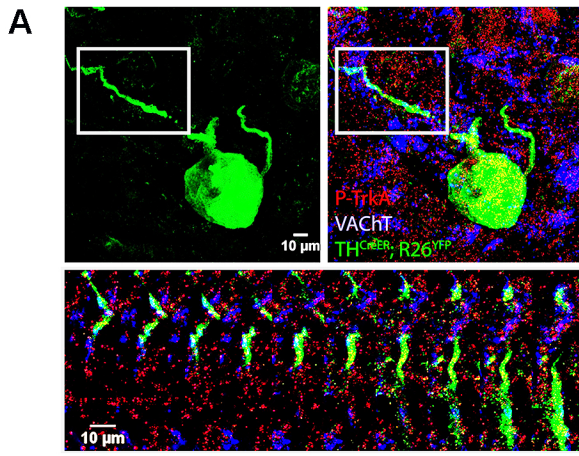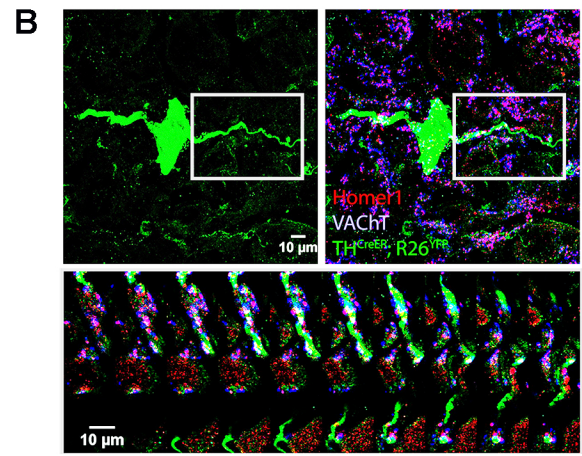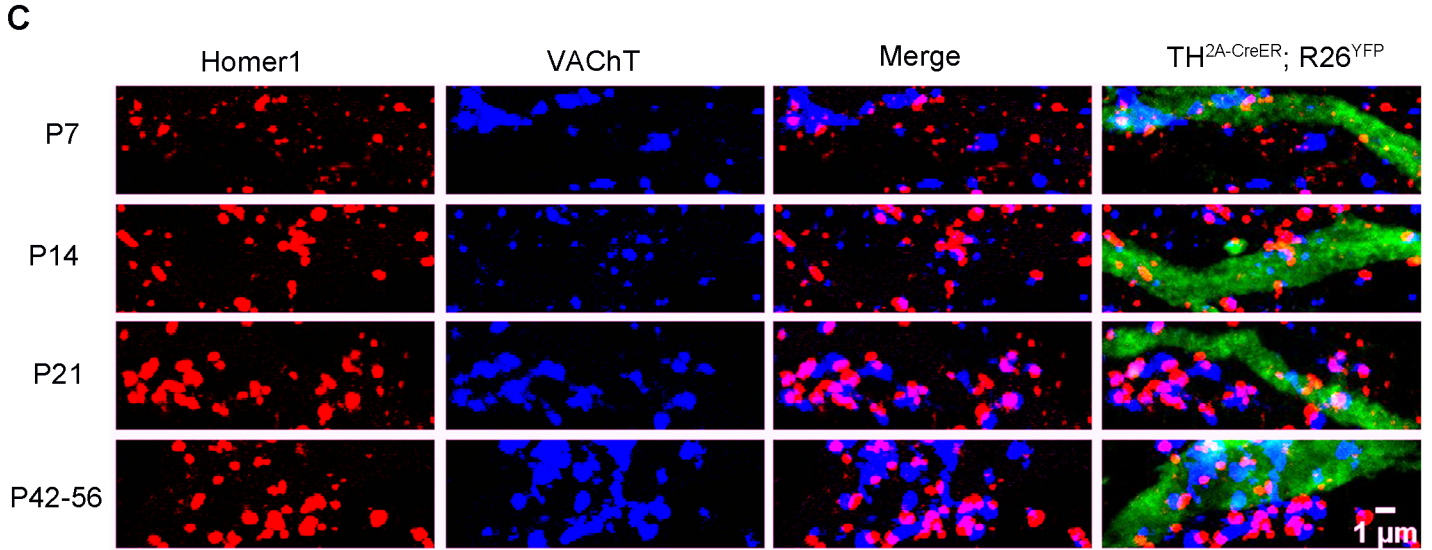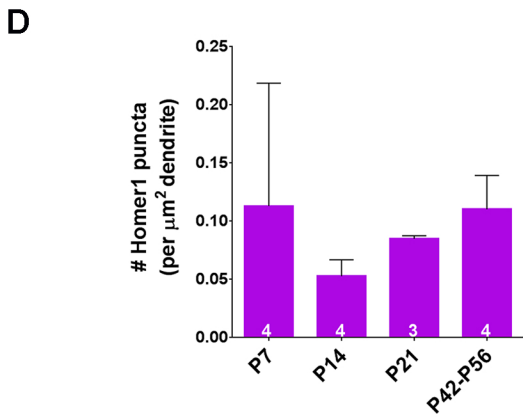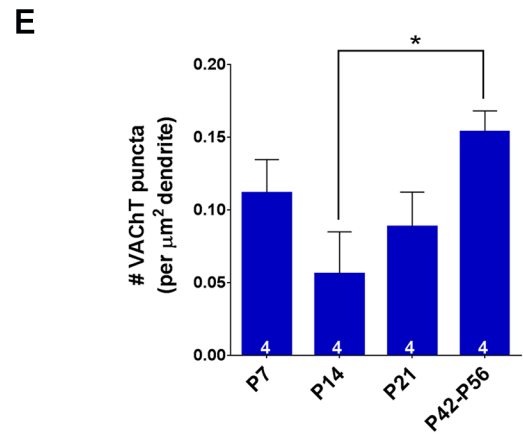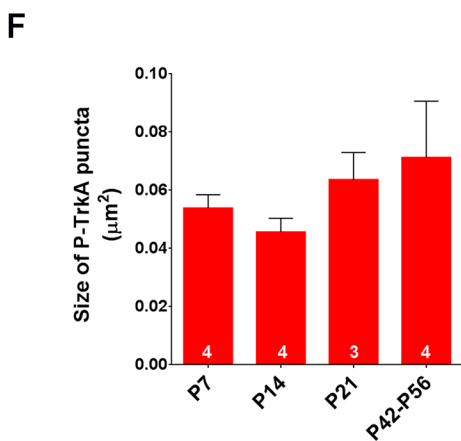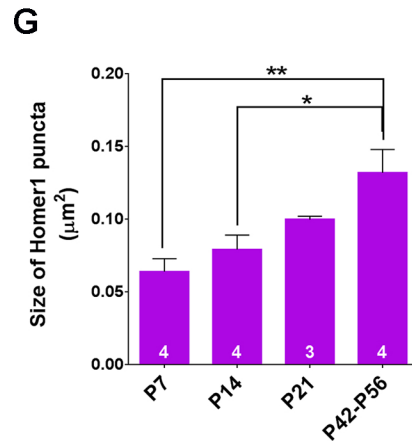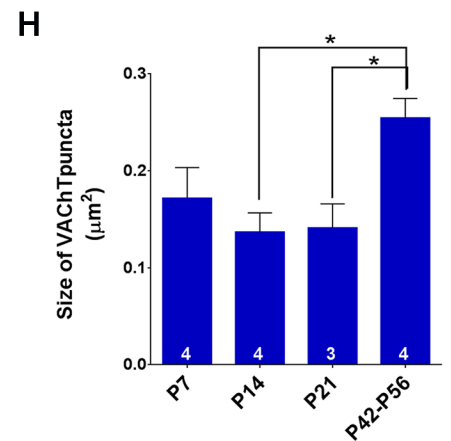

Supplement: NIHMS893019-supplement-Figure_S4.pdf [file NIHMS893019-supplement-Figure_S4.pdf]

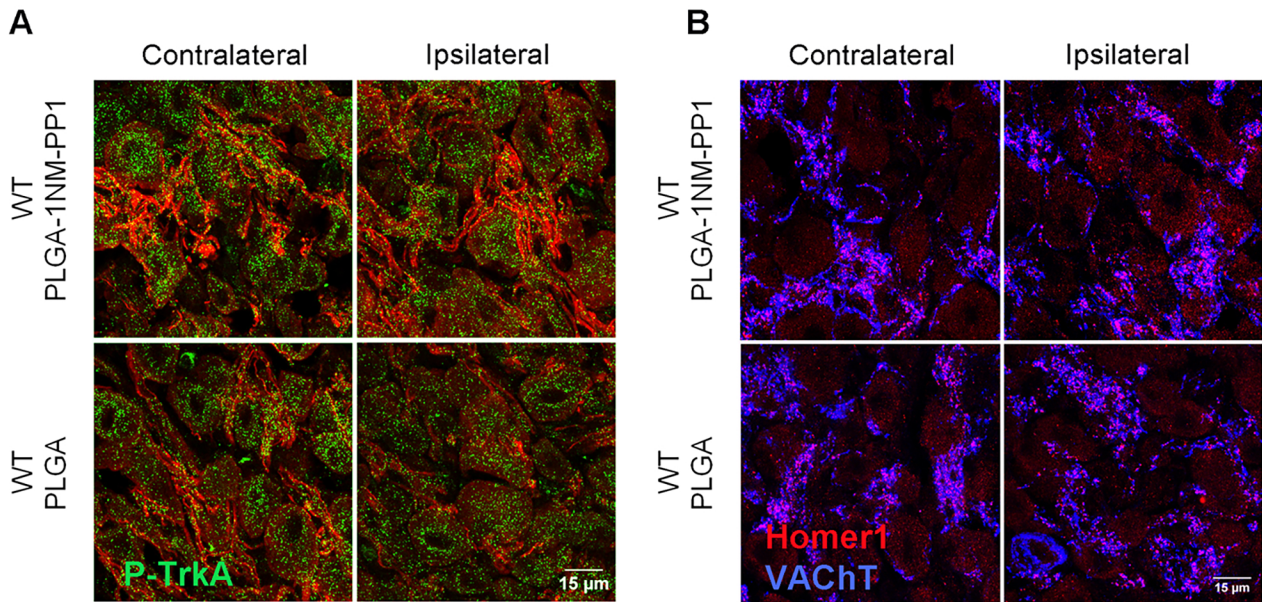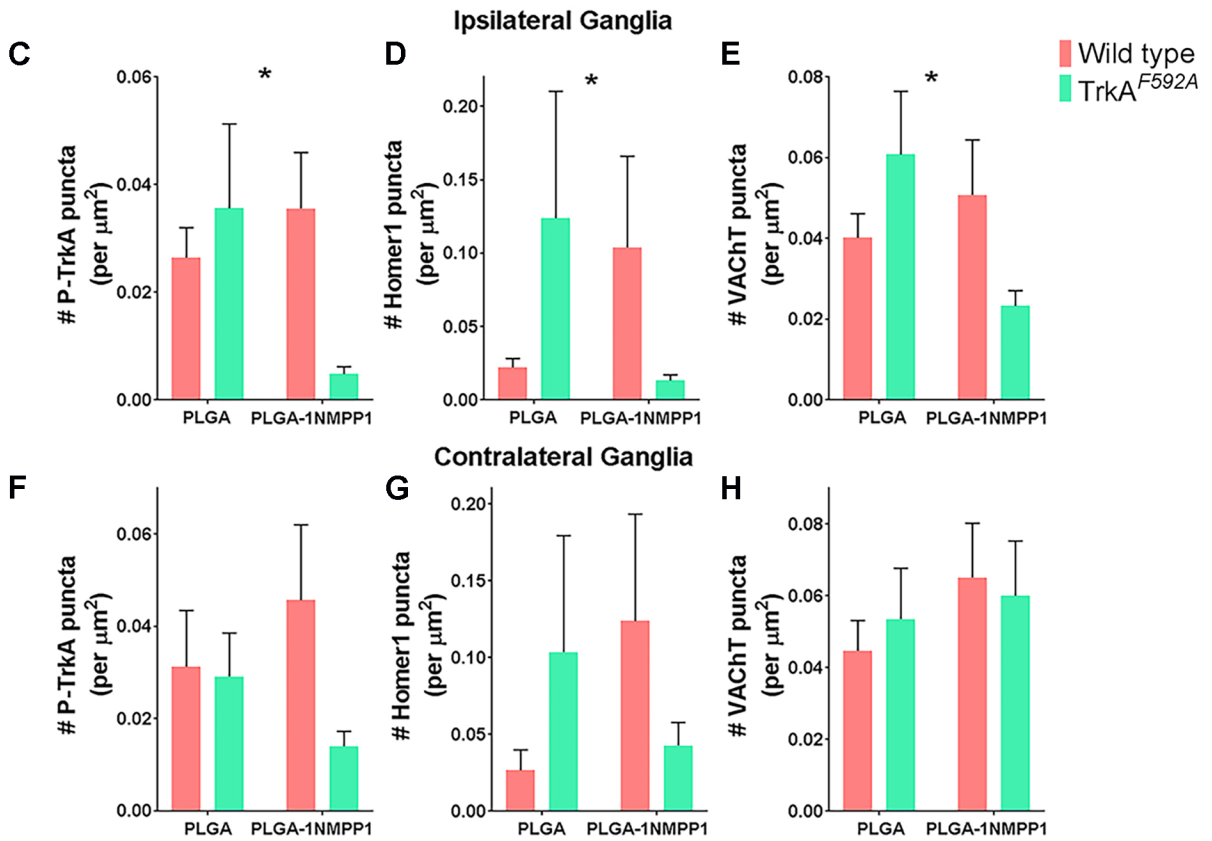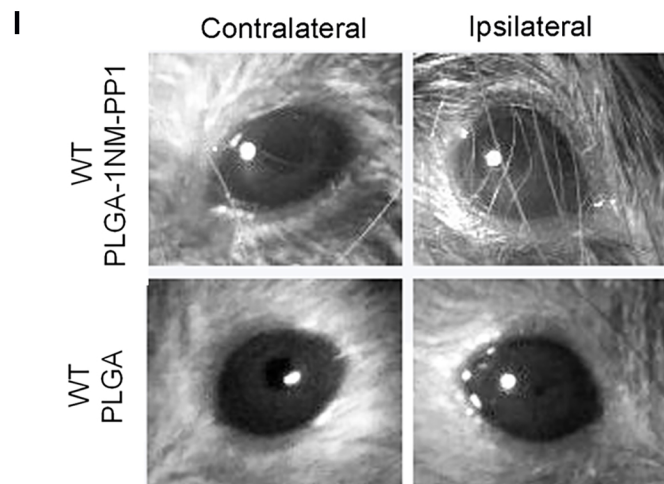

Supplement: NIHMS893019-supplement-Figure_S5.pdf [file NIHMS893019-supplement-Figure_S5.pdf]

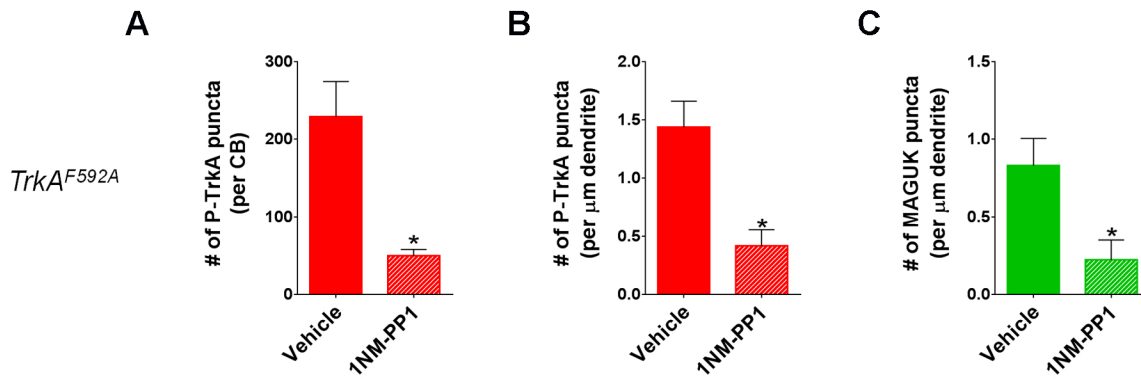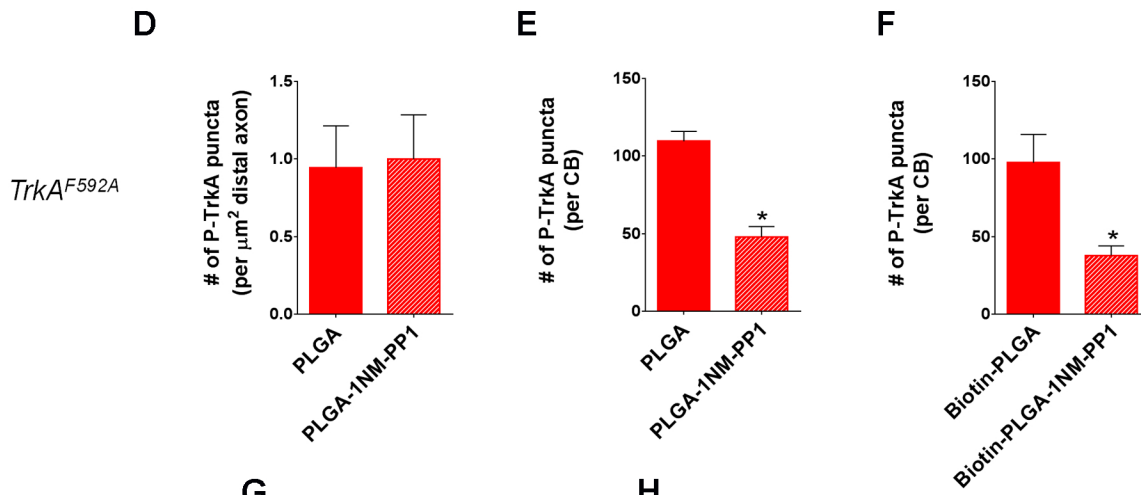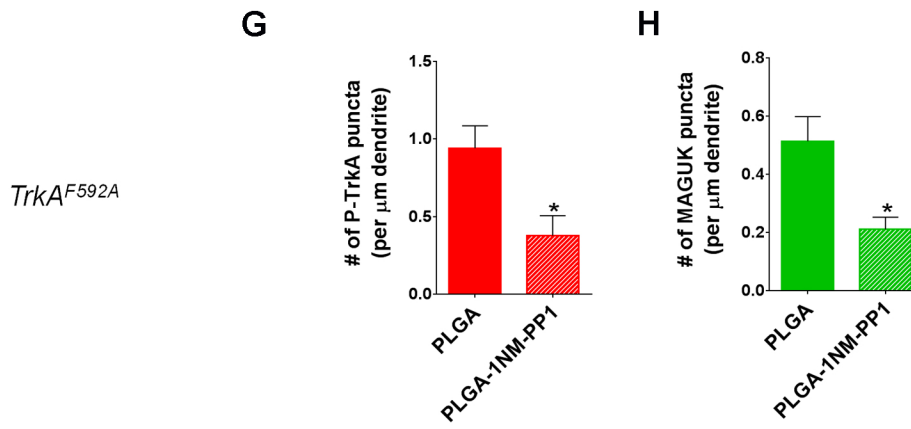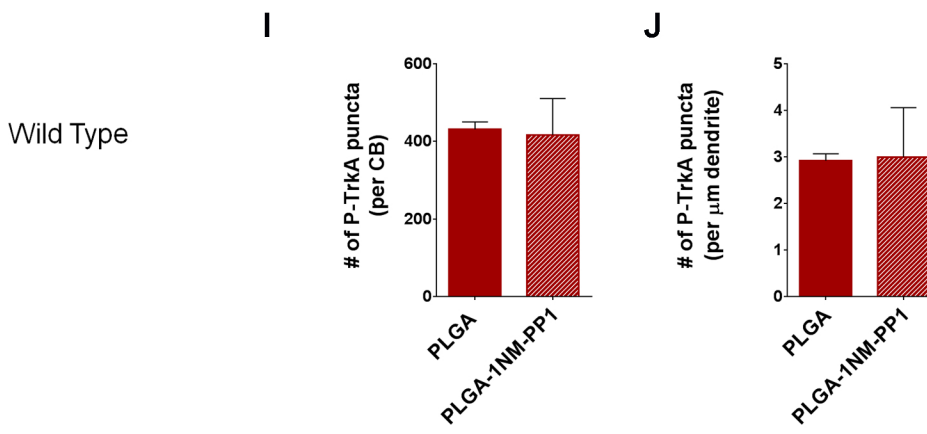

Supplement: NIHMS893019-supplement-Figure_S6.pdf [file NIHMS893019-supplement-Figure_S6.pdf]

A

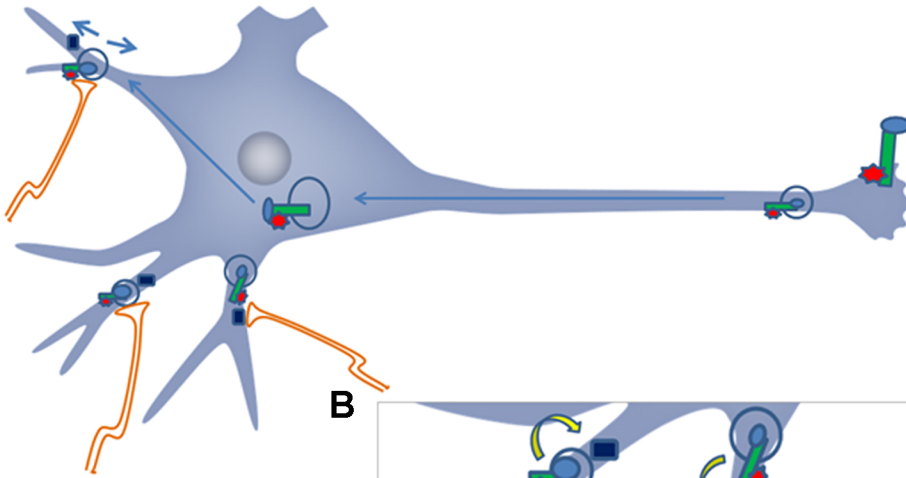

B

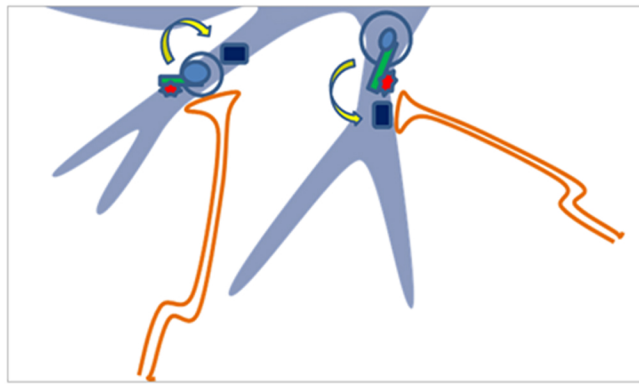

Legend

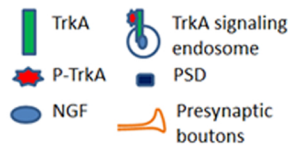

Supplement: NIHMS893019-supplement-Figure_S7.pdf [file NIHMS893019-supplement-Figure_S7.pdf]
